# Supplementary material for: Photostability and photocatalytic degradation of ionic liquids in water under solar light
Source: Royal Society of Chemistry journal article supplement (doi:10.1039/c8ra07867j), 2019-01-01

## Supplementary Material

---

# Photostability and photocatalytic degradation of ionic liquids under solar light

*J. Bedia\**, *J.J Rodriguez*, *D. Moreno*, *J. Palomar*, *C. Belver*

**Figure S1.** XRD pattern (A),  $-196\text{ }^{\circ}\text{C}$   $\text{N}_2$  adsorption-desorption isotherm (B) and UV-vis

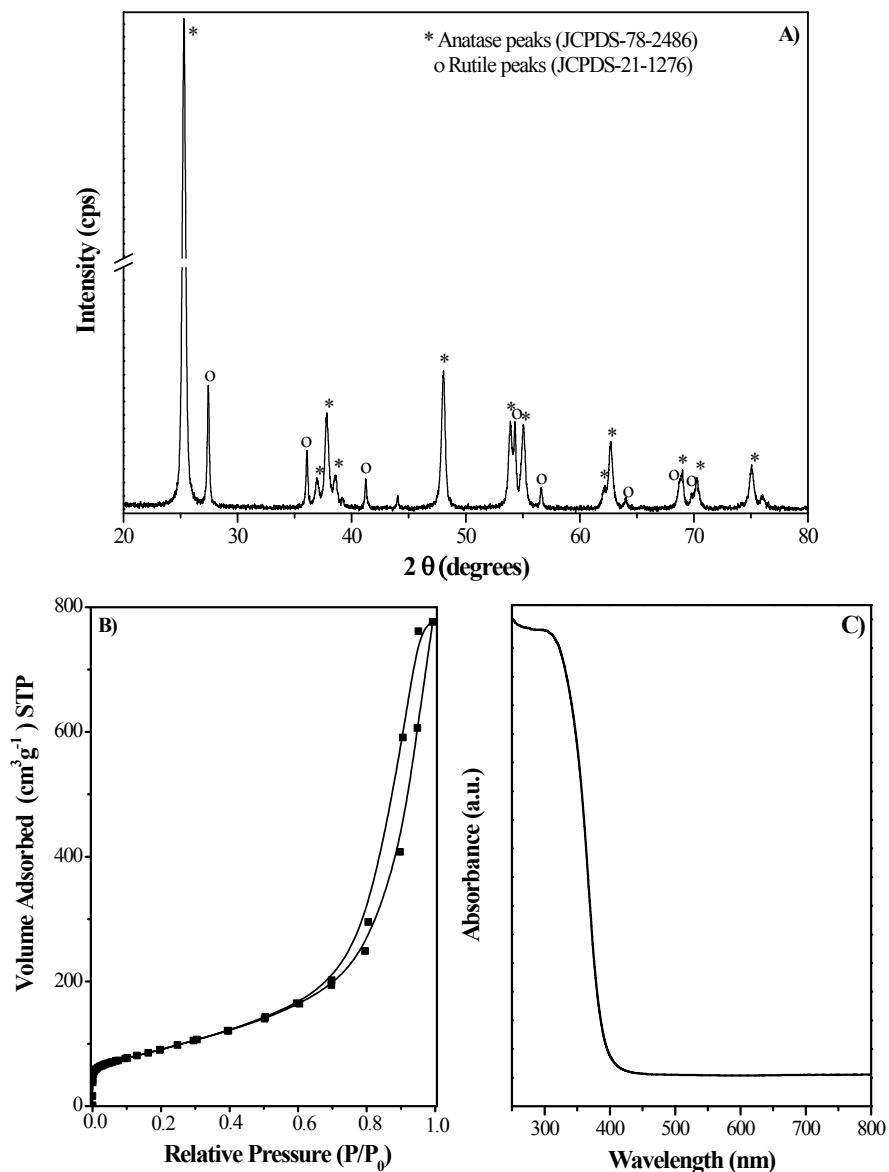

diffuse absorbance spectrum of the commercial  $\text{TiO}_2$  (Aeroxide@P25).

**Characterization techniques description:** X-ray diffraction (XRD) pattern was recorded on a Bruker D8 diffractometer with a scintillation detector, using  $\text{Cu-K}\alpha$  source, with a scan step of  $1^{\circ}\cdot\text{min}^{-1}$  between 20 and  $80^{\circ}$  of  $2\theta$ .  $\text{N}_2$  adsorption-desorption at  $-196\text{ }^{\circ}\text{C}$  was carried out using a Micromeritics TriStar 123 static volumetric system. The sample was previously outgassed under vacuum at  $150\text{ }^{\circ}\text{C}$  overnight in a Florprep 060 Micromeritics device. Shimadzu 2501PC UV-vis spectrophotometer was used to record UV-vis diffuse reflectance spectrum (UV-vis DRS) in the 250–800 nm region using  $\text{BaSO}_4$  as reference material.

**Figure S2.** Molecular model of ion independent (C+A) and ion-pair (CA) for IL (example: [Bmim][Cl])

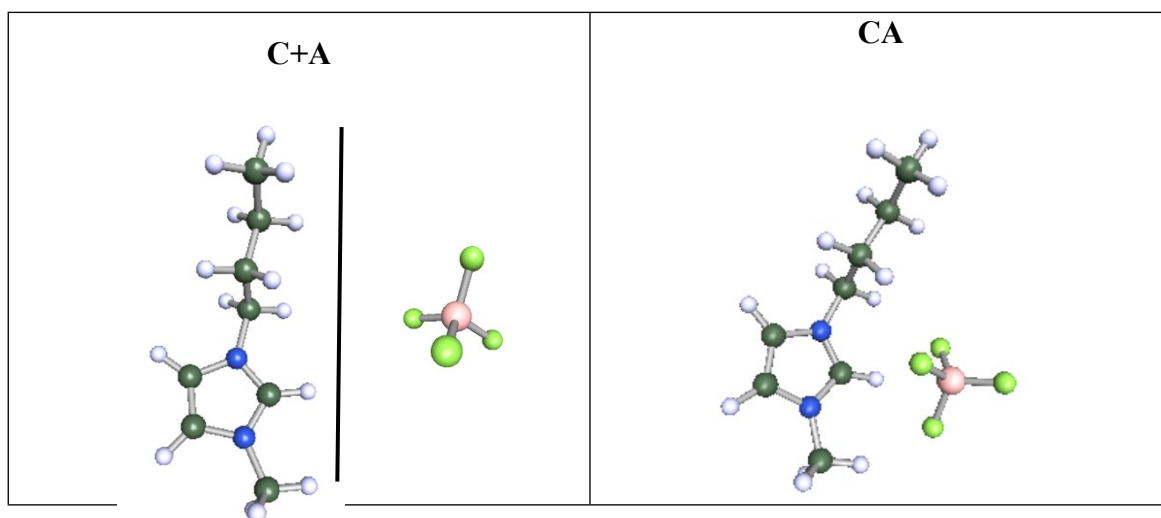

Figure S3. Calculated UV-Visible spectra at TD-B3LYP/6-311\*\*G++ computational level

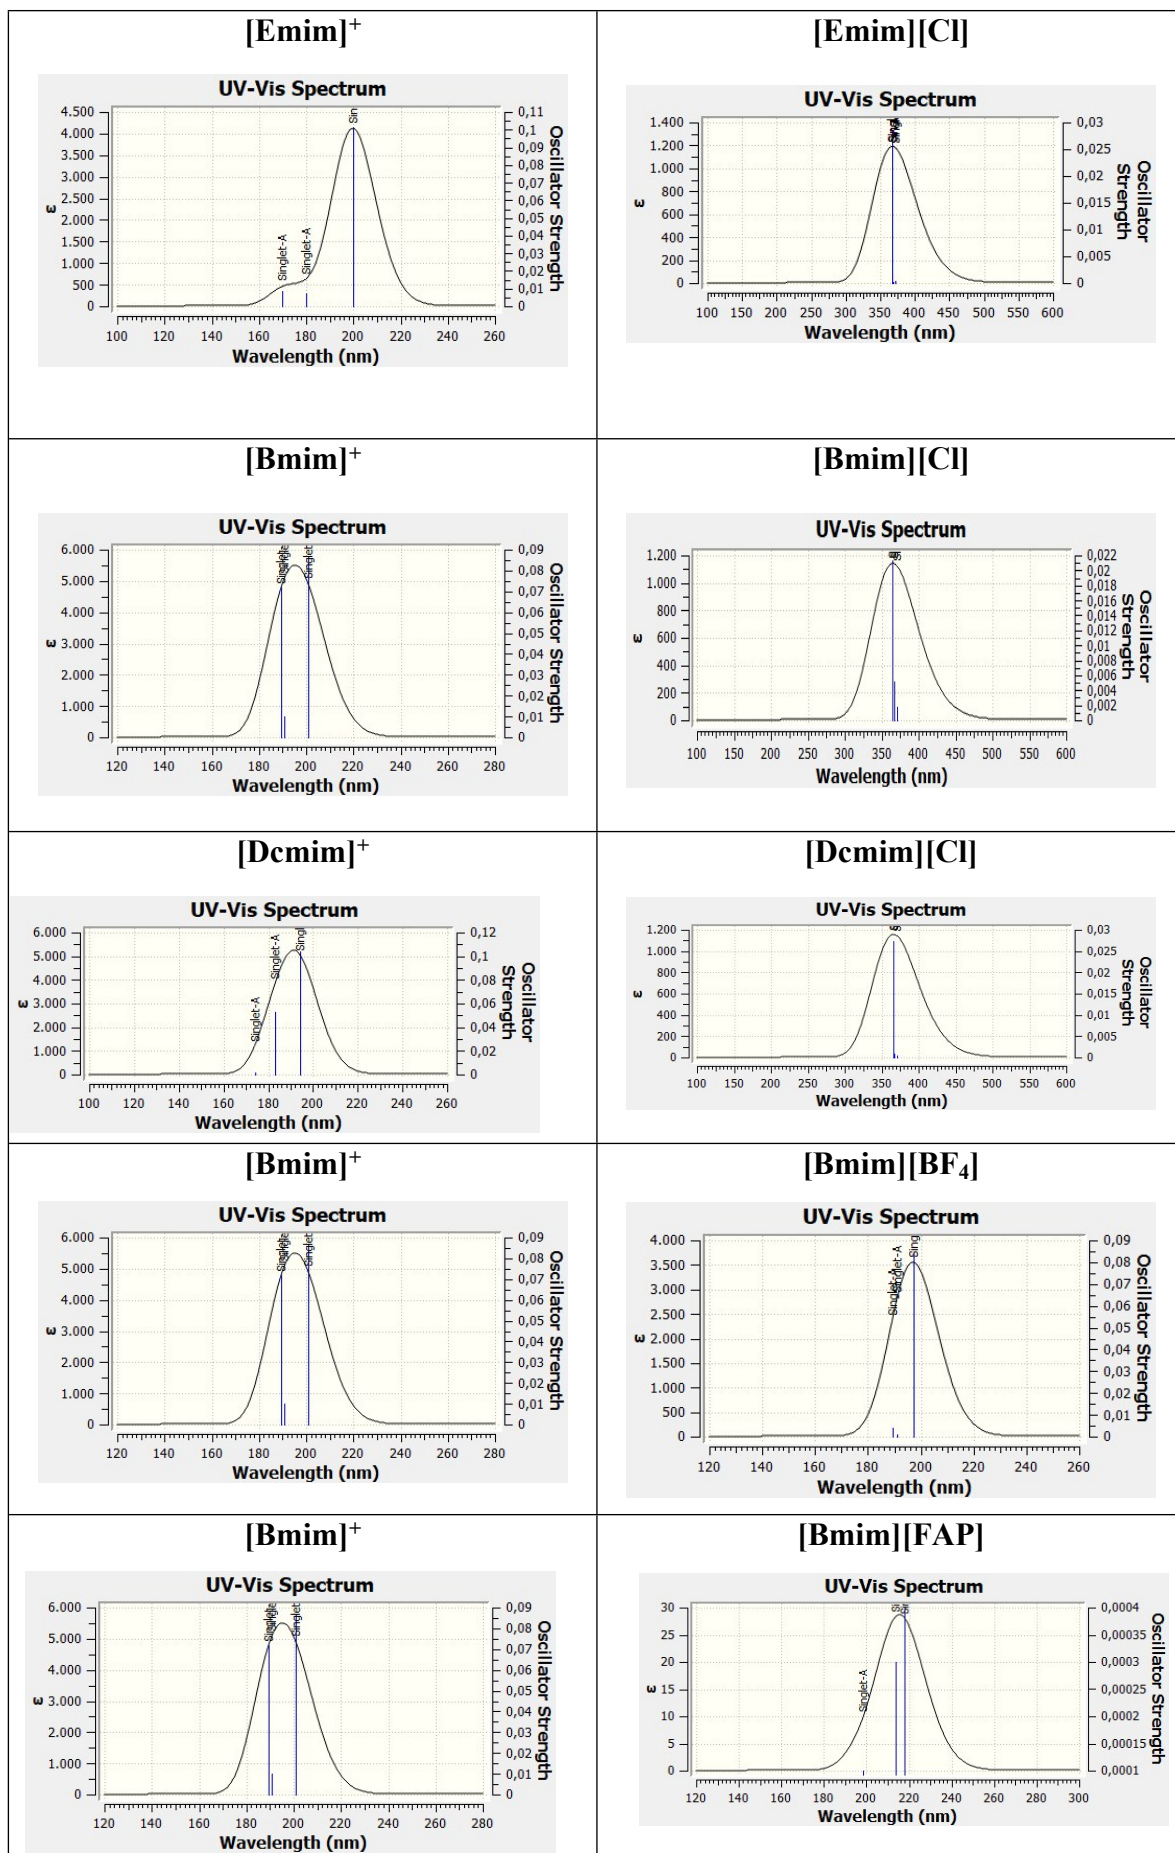

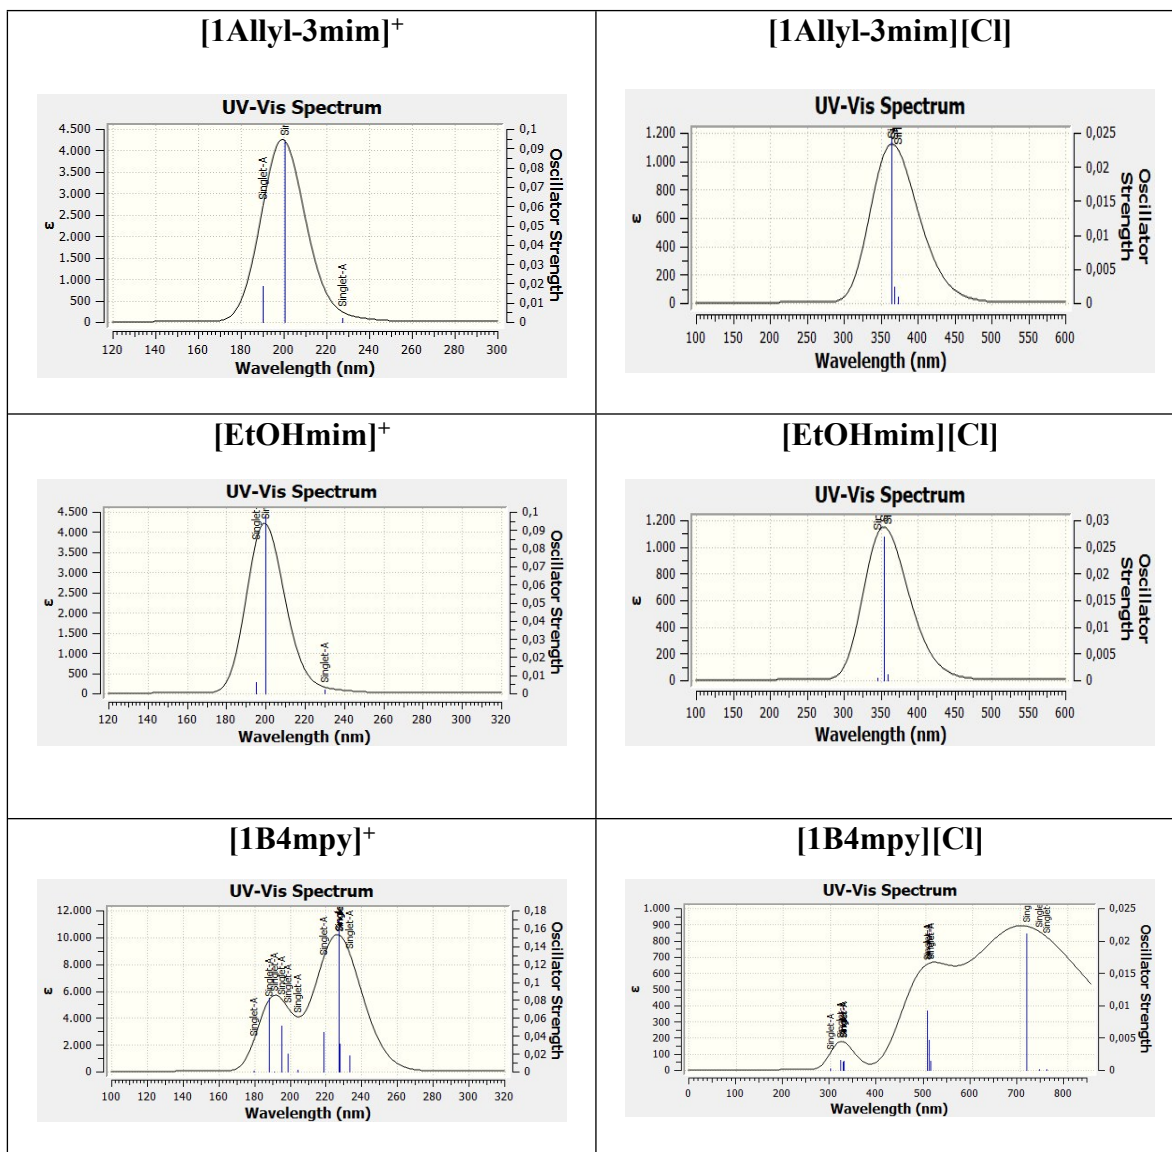

**Figure S4.** Calculated HOMO and LUMO molecular orbitals of [Bmim] cation at TD-B3LYP/6-311\*\*G++ computational level

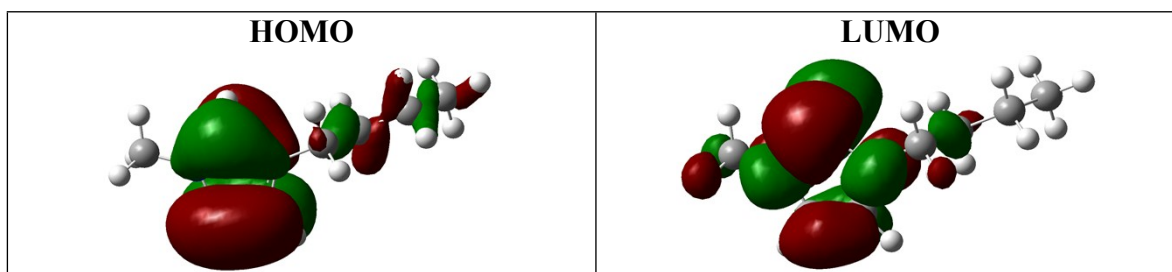

**Figure S5.** Electrostatic potential surface of [Bmim] cation and [Bmim][FAP] ionic pair in fundamental ( $S_0$ ) and first excited ( $S_1$ ) electronic state calculated at TD-B3LYP/6-311\*\*G++ computational level

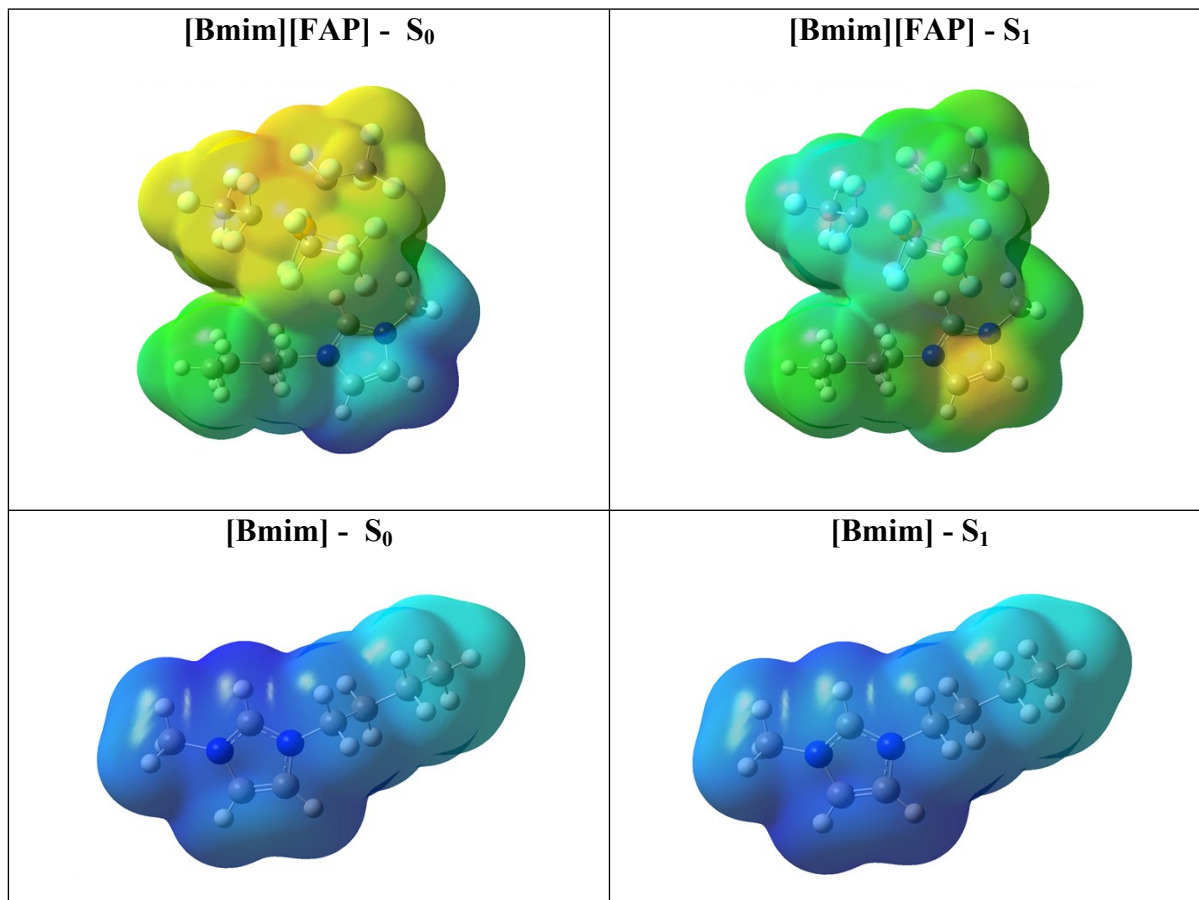

**Figure S6.** Percentage of IL adsorbed onto TiO<sub>2</sub> in dark tests.

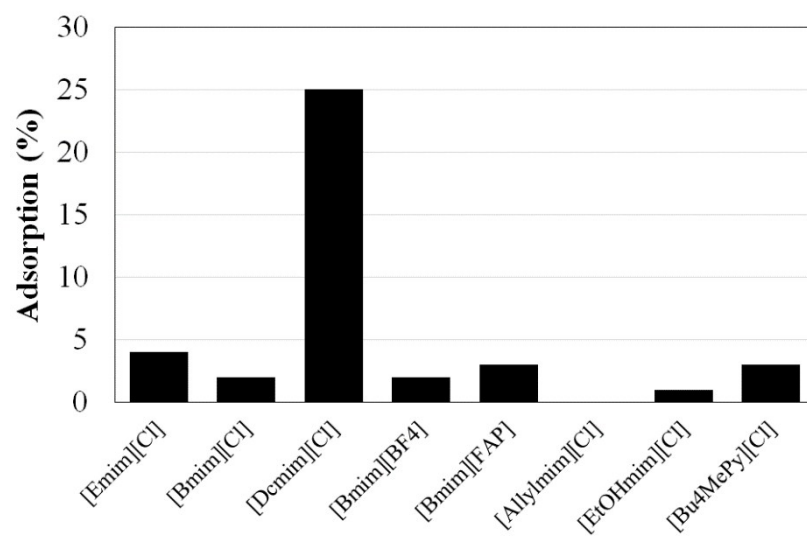

**Figure S7.** Evolution of the TOC and the carbon amount measured from IL, organic acids and non-identified byproducts upon irradiation time: a) [Bmim][Cl] and b) [Bu<sub>4</sub>MePy][Cl].

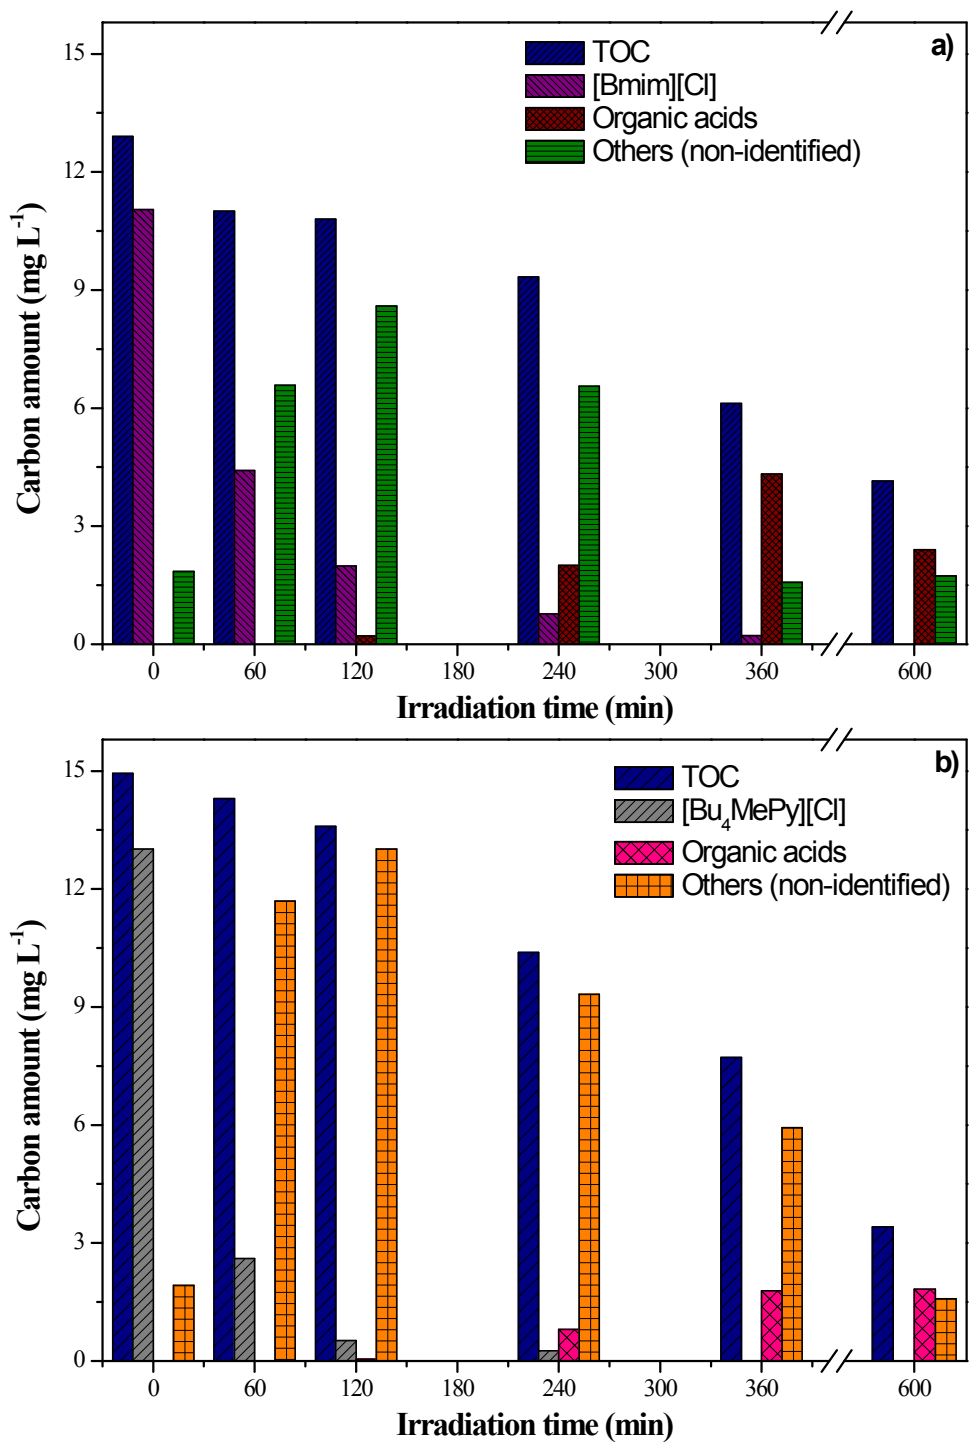

Supplement: c8ra07867j1.pdf [file c8ra07867j1.pdf]
